# Supplementary material for: Effect of Adjunctive Acupuncture on Pain Relief Among Emergency Department Patients With Acute Renal Colic Due to Urolithiasis: A Randomized Clinical Trial
Source: PubMed Central journal article supplement (PMC9364130; doi:10.1001/jamanetworkopen.2022.25735), 2022-08-09
Supplement: jamanetwopen-e2225735-s001.pdf [file jamanetwopen-e2225735-s001.pdf]

19 **Contents**

20 1 Committee composition ..... 1

21 1.1 Protocol committee ..... 1

22 1.2 Steering committee..... 1

23 1.3 Data coordination committee ..... 1

24 1.4 Publication committee..... 1

25 2 Study contacts and organizations ..... 1

26 2.1 Study contacts ..... 1

27 2.2 Recruiting site ..... 2

28 3 Background ..... 2

29 4 Study hypotheses ..... 3

30 5 Methodology ..... 3

31 5.1 Study design ..... 3

32 5.2 Randomization and blinding ..... 3

33 5.3 Sample size ..... 3

34 5.4 Participant recruitment, screening and group assignment..... 4

35 5.5 Inclusion criteria ..... 4

36 5.8 Exclusion criteria ..... 5

37 6 Outcome measurement..... 5

38 6.1 Primary outcome ..... 5

39 6.2 Secondary outcomes ..... 5

40 7 Interventions ..... 6

41 7.1 Acupuncture ..... 6

42 7.2 Sham acupuncture ..... 6

43 8 Quality control ..... 7

44 9 Statistical analysis ..... 8

45 9 Protocol revision history ..... 8

46 References..... 8

47

48 **1 Committee composition**

49 **1.1 Protocol committee**

50

**Table 1 Protocol committee**

| Name           | Affiliation                                      | Email address           |
|----------------|--------------------------------------------------|-------------------------|
| Cun-Zhi Liu    | Beijing University of Chinese Medicine           | lcz623780@126.com       |
| Zhi-Cheng Qu   | Beijing Hospital of Traditional Chinese Medicine | qzhch0824@163.com       |
| Jian-Feng Tu   | Beijing University of Chinese Medicine           | tujianfeng1@126.com     |
| Ying Cao       | Beijing Hospital of Traditional Chinese Medicine | caoying7c@163.com       |
| Lian-Cheng Jia | Beijing Hospital of Traditional Chinese Medicine | drjialiancheng@sina.com |
| Bao-Li Liu     | Beijing Hospital of Traditional Chinese Medicine | liubaoli@bjzhongyi.com  |
| Wei-Hai Yao    | Beijing Hospital of Traditional Chinese Medicine | lyao@126.com            |
| Guang-Xia Shi  | Beijing University of Chinese Medicine           | shiguangxia2008@126.com |

51

52 **1.2 Steering committee**

53

**Table 2 Steering committee**

| Name           | Affiliation                                      | Email address           |
|----------------|--------------------------------------------------|-------------------------|
| Cun-Zhi Liu    | Beijing University of Chinese Medicine           | lcz623780@126.com       |
| Zhi-Cheng Qu   | Beijing Hospital of Traditional Chinese Medicine | qzhch0824@163.com       |
| Jian-Feng Tu   | Beijing University of Chinese Medicine           | tujianfeng1@126.com     |
| Ying Cao       | Beijing Hospital of Traditional Chinese Medicine | caoying7c@163.com       |
| Lian-Cheng Jia | Beijing Hospital of Traditional Chinese Medicine | drjialiancheng@sina.com |
| Jing-Wen Yang  | Beijing University of Chinese Medicine           | yangjw0626@126.com      |
| Shi-Yan Yan    | Beijing University of Chinese Medicine           | yanshiyan0927@sina.com  |
| Xiao-Lu Pei    | Beijing Hospital of Traditional Chinese Medicine | luisa2013@163.com       |

54

55 **1.3 Data coordination committee**

56

**Table 3 Data coordination committee**

| Name          | Affiliation                            | Email address           |
|---------------|----------------------------------------|-------------------------|
| Li-Qiong Wang | Beijing University of Chinese Medicine | wangliqiongwork@163.com |
| Yan Cao       | Beijing University of Chinese Medicine | caoyan92cy@163.com      |
| He-Wen Li     | Beijing University of Chinese Medicine | 1352686576@qq.com       |

57

58 **1.4 Publication committee**

59 Members of the publication committee include Cun-Zhi Liu, Zhi-Cheng Qu, Jian-Feng Tu and Ying  
60 Cao.

61 **2 Study contacts and organizations**

62 **2.1 Study contacts**

63 **Principal investigator for grant**

64 Cun-Zhi Liu, MD PhD

65 International Acupuncture and Moxibustion Innovation Institute, School of Acupuncture-Moxibustion  
66 and Tuina, Beijing University of Chinese Medicine; No. 11, Bei San Huan Dong Lu, Chaoyang District,  
67 Beijing 100029, China

68 Phone: +86 1053912201

69 Email: lcz623780@126.com

70 Zhi-Cheng Qu, MD, PhD  
71 Beijing Hospital of Traditional Chinese Medicine Affiliated to Capital Medical University, No. 23  
72 Meishuguanhou Street, Dongcheng District, Beijing 100010, China  
73 Phone: +86 10 52176575  
74 E-mail: qzhch0824@163.com

75

76 **Principal investigator for trial**

77 Cun-Zhi Liu, MD PhD  
78 International Acupuncture and Moxibustion Innovation Institute, School of Acupuncture-Moxibustion  
79 and Tuina, Beijing University of Chinese Medicine; No. 11, Bei San Huan Dong Lu, Chaoyang District,  
80 Beijing 100029, China  
81 Phone: +86 1053912201  
82 Email: lcz623780@126.com

83

84 Zhi-Cheng Qu, MD, PhD  
85 Beijing Hospital of Traditional Chinese Medicine Affiliated to Capital Medical University, No. 23  
86 Meishuguanhou Street, Dongcheng District, Beijing 100010, China  
87 Phone: +86 10 52176575  
88 E-mail: qzhch0824@163.com

89

90 **2.2 Recruiting site**

91 **Beijing Hospital of Traditional Chinese Medicine Affiliated to Capital Medical University**

92 Zhi-Cheng Qu, MD, PhD  
93 Beijing Hospital of Traditional Chinese Medicine Affiliated to Capital Medical University, No. 23  
94 Meishuguanhou Street, Dongcheng District, Beijing 100010, China  
95 Phone: +86 10 52176575  
96 E-mail: qzhch0824@163.com

97

98 Ying Cao, MSc  
99 Beijing Hospital of Traditional Chinese Medicine Affiliated to Capital Medical University, No. 23  
100 Meishuguanhou Street, Dongcheng District, Beijing 100010, China  
101 Phone: +86 10 52176575  
102 E-mail: caoying7c@163.com

103

104 **3 Background**

105 Acute renal colic caused by urinary calculi (ARCUC) is described as acute unbearable paroxysmal pain  
106 in the lower back or upper abdomen, with or without hematuria, nausea, and vomiting.<sup>1</sup> Urinary stone  
107 disease was increasingly prevalent, with a lifetime risk of about 12% in men and 6% in women.<sup>2</sup> The  
108 prevalence of kidney stones in China was 6.4% (6.5% in men and 5.1% in women).<sup>3</sup> In the USA, more  
109 than one million patients visit the emergency department for the ARCUC every year.<sup>4</sup> It is described as  
110 one of the worst pains a patient could have and has a considerable impact on quality of life.

111 Pain relief is the primary goal in the management of patients with ARCUC.<sup>1</sup> NSAIDs offer effective  
112 sustained analgesia for ARCUC in the emergency department<sup>5</sup> and result in a lower need for rescue  
113 analgesia.<sup>6</sup> The 2017 update of the European Association of Urology (EAU) guidelines recommends

114 NSAIDs as the first-line analgesic.<sup>1</sup> However, its clinical application is partly limited for the increased  
115 risk of major coronary events which increase with dose and duration.<sup>7,8</sup> Furthermore, the onset time of  
116 NSAIDs is relatively slow, with the time to peak plasma concentration of 10-30 minutes after  
117 intramuscular injection<sup>9</sup>. More than 30% patients did not achieve satisfactory relief of pain after had  
118 NSAIDs<sup>5</sup>. Adjunctive therapy with quick analgesia effect and less adverse event is needed for patients  
119 with ARCUC.

120 Acupuncture is a complementary therapy from traditional Chinese medicine, which has the advantages  
121 of quick analgesia.<sup>10-11</sup> A meta-analysis suggested that acupuncture may be a potential therapy for  
122 ARCUC.<sup>12</sup> However, to our knowledge, there is no randomized controlled trial (RCT) to measure the  
123 efficacy of acupuncture as adjunctive treatment to NSAIDs for ARCUC. This randomized,  
124 participant-blind, sham-controlled trial is designed to evaluate the efficacy and safety of acupuncture as  
125 adjunctive treatment to diclofenac for ARCUC.

#### 126 **4 Study hypotheses**

127 The following hypotheses will be tested:

128 H1: There is a significant difference in the participants' response rate at 10 minutes between the  
129 acupuncture group and the sham acupuncture group

130 H0: There is no difference in the participants' response rate at 10 minutes between the acupuncture  
131 group and the sham acupuncture group

#### 132 **5 Methodology**

##### 133 **5.1 Study design**

134 This is a single-center, participant-blinded, parallel-group, randomized controlled study at Emergency  
135 Department in China. Participants with ARCUC will be randomized into acupuncture group or sham  
136 acupuncture group in a 1:1 ratio.

##### 137 **5.2 Randomization and blinding**

138 The blocked randomization sequence will be computer-generated with the SAS 9.4 software by an  
139 independent professional statistician (Jing Hu, Beijing Hospital of Traditional Chinese Medicine,  
140 Capital Medical University), who is not involved in the implementation and statistical analysis of the  
141 trial. The sealed envelopes will be numbered in sequential order from 1 to 80 to hide the group  
142 assignments and be saved by a research assistant who does not take part in enrolling patients. When  
143 eligible patients are enrolled into the trial, envelopes will be successively opened by the clinical  
144 research coordinators who are responsible for enrolling the patients. Due to the responsibility of  
145 providing acupuncture and sham acupuncture, the acupuncturists will not be masked. Patients in the  
146 two acupuncture groups will be treated in a single treatment room and be blinded to which acupuncture  
147 method they would receive. In addition, outcome assessors, and statisticians who perform the statistical  
148 analyses will be blinded. The group assignments will be revealed after the statistical analysis is  
149 completed.

##### 150 **5.3 Sample size**

151 In this study, the sample size was priori calculated. Based on the previous literature<sup>13</sup> and our clinical  
152 experience, the response rates in the acupuncture group and sham acupuncture group are expected to be  
153 70% and 40%, respectively. The ratio between acupuncture group and sham acupuncture group was 1:1.  
154 A sample size of 80 patients (40 in each group) is estimated to have at least 80% power to detect  
155 difference between groups at a 2-sided significance level of 5% according to the formula:

156 
$$n = \left[ \frac{z_{\alpha} \sqrt{4\pi_c(1-\pi_c)} + z_{\beta} \sqrt{2\pi_1(1-\pi_1) + \pi_2(1-\pi_2)}}{\pi_1 - \pi_2} \right]^2$$
. Because there is only one session of acupuncture

157 treatment and almost no shedding, no loss to follow-up is considered. Thus, the recruitment goal was  
 158 set at 80 patients.

159 **5.4 Participant recruitment, screening and group assignment**

160 Participants who are diagnosed as ARCUC according to the guideline of European Association of  
 161 Urology will be recruited at Beijing Hospital of Traditional Chinese Medicine Affiliated to Capital  
 162 Medical University.<sup>1</sup> The recruitment strategy will primarily contain advertisements on outpatient  
 163 clinics, the emergency room and hospital social Internet media (WeChat). Written informed consent  
 164 will be provided by each patient through research assistant before randomization. The evaluators will  
 165 record the data on the electronic case report form (CRF) through the whole trial period. The participant  
 166 flow was shown in Figure 1 and Figure 2.

167

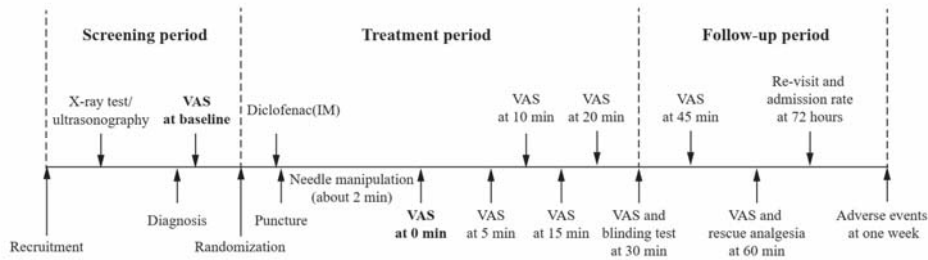

168

169 **Figure 1 Procedure of treatment and visit**

170

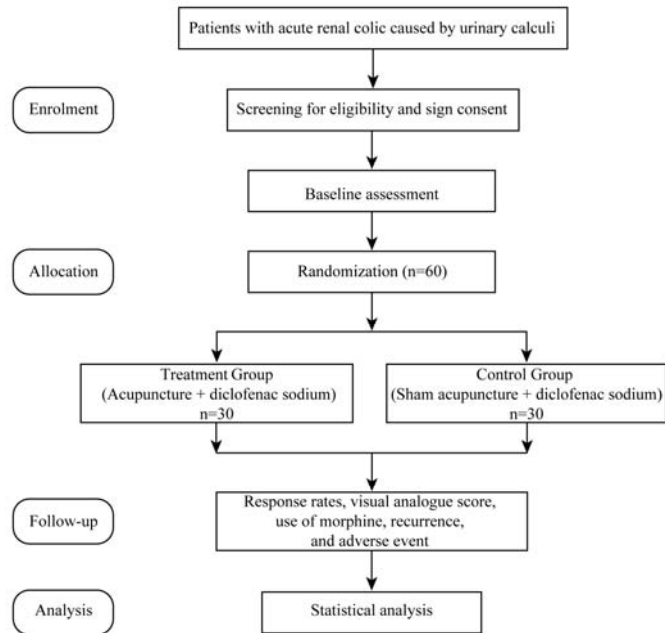

171

172 **Figure 2 Flow diagram**

173 **5.5 Inclusion criteria**

174 Participants will be included in the study if they meet the following criteria.

- 175 1. Diagnosed as ARCUC according to the guideline of European Association of Urology (2017)<sup>1</sup>  
 176 2. Aged 18-75 years (either sex)

177 3. Pain intensity of 4 or more out of 10 on a visual analogue scale (VAS)<sup>14</sup>

178 4. Written informed consent

### 179 **5.8 Exclusion criteria**

180 Participants will be excluded from the study if they met the following criteria.

181 1. Use of any analgesia in the last 6 hours

182 2. Allergic to diclofenac sodium, morphine, or anisodamine; history of asthma, urticaria or allergic  
183 rhinitis ascribed to acetylsalicylic acid or other drugs containing prostaglandin synthase inhibitors

184 3. Congestive heart failure, acute ischemic heart disease, or peripheral vascular disease; acute  
185 cerebrovascular disease, increased intracranial pressure; renal or liver failure

186 4. Active digestive ulcer, pyloric obstruction, or intestinal obstruction

187 5. Blood system diseases: such as hemophilia, coagulation disorders in patients;  
188 Thrombocytopenia ( $< 50 \times 10^9/L$ ); using anticoagulants

189 6. Glaucoma, elevated intraocular pressure

190 7. Serious adverse reactions to acupuncture; skin infection at acupuncture site

191 8. History of mental illness or substance abuse, or have severe cognitive impairment

192 9. Pregnant or lactating.

### 193 **6 Outcome measurement**

194 For participants with unilateral osteoarthritis, the knee affected will be assessed throughout the entire  
195 study. For bilateral osteoarthritis, the most painful knee at baseline will be the one assessed throughout  
196 the entire study<sup>15</sup>.

#### 197 **6.1 Primary outcome**

198 The primary outcome was the response rate at 10 minutes after needle manipulation. The response  
199 rate was defined as the proportion of participants whose pain score on VAS reduces at least 50%  
200 compared with baseline.<sup>5</sup>

#### 201 **6.2 Secondary outcomes**

202 1. Total pain

203 ~~The response rate will also be measured at weeks 4, 16, and 26 after randomization.~~

204 The total pain will be defined by the area under the curve during the 60 minutes.<sup>15</sup> The pain will  
205 be assessed using a VAS<sup>14</sup> with scores ranging from 0 to 10 at baseline and after 0, 5, 10, 15, 20,  
206 30, 45, and 60 minutes. The bigger of the area under the curve indicates worse pain.

207 2. Response rate at other times

208 The proportion of participants achieving significant pain reduction will also be measured after 0, 5,  
209 15, 20, 30, 45, and 60 minutes.

210 3. Remedial analgesia

211 The number of patients who receive intravenous morphine and intramuscular racanisodamine will  
212 be recorded after 60 minutes.

213 4. Re-visit and admission rate

214 The numbers of patients who re-visit the emergency department or are hospitalized will be  
215 evaluated during 72 hours.

216 5. Blinding assessment

217 All patients will be asked to guess whether they receive acupuncture or sham acupuncture after  
218 acupuncture treatment to measure the patient-blinding effects.

219 6. Adverse events

220 All adverse events will be recorded by outcome assessors during 7 days after treatment. Based on

221 the potential relationship between needling and adverse events, adverse events will be categorized  
222 as treatment-related or not.

## 223 **7 Interventions**

224 Patients in both acupuncture group and sham acupuncture group will receive 50 mg/2 mL diclofenac  
225 sodium intramuscular injection after randomization (Guangdong Bangmin Pharmaceutical Co, LTD).  
226 Both acupuncture and sham acupuncture will be performed by the licensed doctors of traditional  
227 Chinese medicine with at least 5 years of experience. Meanwhile, acupuncture will be performed by the  
228 licensed doctors of traditional Chinese medicine who have been trained how to locate acupoints and  
229 non-acupoints, puncture, and manipulate needles before the trial. Sterile disposable stainless steel  
230 acupuncture needles (length: 40 mm, diameter: 0.3 mm; Hwato, Suzhou, China) will be used. Both  
231 acupuncture and sham acupuncture treatment will only consist of 1 session treatment with 30 minutes.  
232 Needles will be removed if the patients suffer from any adverse events (AEs). Patients will receive  
233 0.1mg/kg intravenous morphine (Northeast Pharmaceutical Group Shenyang First Pharmaceutical Co,  
234 LTD) and 10mg intramuscular racanisodamine (Tianjin KingYork Pharmaceutical Co, LTD) if they  
235 report the severity of pain more than 8 points on the VAS. No additional intravenous fluid will be  
236 administered in the first 60 minutes after administration of the diclofenac sodium.

### 237 **7.1 Acupuncture**

238 Patients allocated to the acupuncture group will be punctured at the pre-specified acupoints. According  
239 to the theory of traditional Chinese medicine and clinical experience, bilateral Yaotongdian (EX-UE 7)  
240 will be used. According to the National standard of the People's Republic of China, EX-UE 7 will  
241 contain two points on the dorsum of the hand. The one is between the second and the third metacarpal  
242 bones, and the other is between the fourth and the fifth metacarpal bones. These two points are of the  
243 same distance to the metacarpophalangeal joints and the transverse crease of the wrist. The localization  
244 of EX-UE 7 is exhibited in Figure 3. Four needles will be used for per patient, and the depth of needle  
245 insertion will be 8-10 mm. Manipulations of twirling, lifting, and thrusting will be performed on all  
246 needles for at least 30s to reach De qi (a compositional sensation including soreness, numbness,  
247 distention, and heaviness), which is believed to be an essential component for acupuncture efficacy.

### 248 **7.2 Sham acupuncture**

249 A superficial skin penetration (1–4 mm in depth) at non-acupoints will be performed in the sham  
250 acupuncture group, without needle manipulation for De qi. Based on the search and analyses of  
251 traditional Chinese medicine reference books and acupuncture modern articles, the acupoints with  
252 effects on alleviating ARCUC or pain have been screened. After excluding these acupoints, 16 points  
253 without effects on ARCUC and pain are extracted and the locations 3 mm apart from these 16  
254 acupoints are defined as non-acupoints, which are used in the sham acupuncture group. The locations  
255 of these non-acupoints are shown in Table 4 and Figure 3. To make the quantity of stimulus uniform  
256 between two groups, the same number of needles for sham acupuncture will be same to those in verum  
257 acupuncture. The 16 non-acupoints will be randomly assigned to 8 subgroups and will be recorded in  
258 predetermined computer-made randomization sealed envelopes. Each subgroup has bilateral 2  
259 non-acupoints on the arms. The patients in the sham acupuncture group will be assigned into 1 of these  
260 8 subgroups. This method to define non-acupoints in sham acupuncture has been used in previous  
261 acupuncture trials<sup>16</sup>.

262  
263



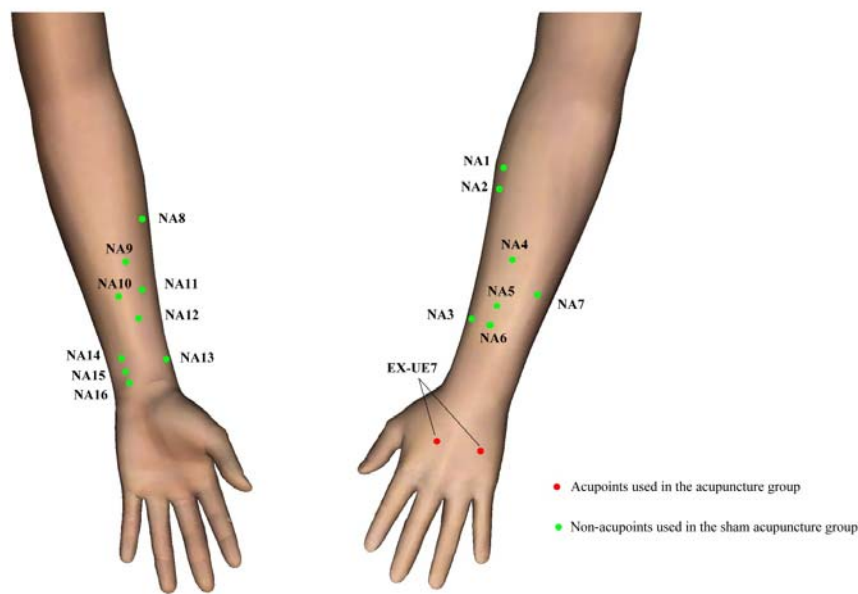

Figure 3 Locations of acupoints and non-acupoints

Table 4 Locations of non-acupoints in SA group

| Subgroup | Non-Acupoints | Locations                                         |
|----------|---------------|---------------------------------------------------|
| 1        | NA 1          | 3 mm lateral to the Shanglian (LI9) horizontally  |
|          | NA 3          | 3 mm lateral to the Pianli (LI6) horizontally     |
| 2        | NA 4          | 3 mm lateral to the Sidu (TE9) horizontally       |
|          | NA 16         | 3 mm lateral to the Yinxi (HT6) horizontally      |
| 3        | NA 6          | 3 mm lateral to the Zhigou (TE6) horizontally     |
|          | NA 8          | 3 mm lateral to the Kongzui (LU6) horizontally    |
| 4        | NA 12         | 3 mm lateral to the Jianshi (PC5) horizontally    |
|          | NA 2          | 3 mm lateral to the Xialian (LI8) horizontally    |
| 5        | NA 7          | 3 mm lateral to the Zhizheng (SI7) horizontally   |
|          | NA 11         | 3 mm lateral to the Erbai (EX-UE2) horizontally   |
| 6        | NA 5          | 3 mm lateral to the Sanyangluo (TE8) horizontally |
|          | NA 13         | 3 mm lateral to the Jingqu (LU8) horizontally     |
| 7        | NA 9          | 3 mm lateral to the Ximen (PC4) horizontally      |
|          | NA 15         | 3 mm lateral to the Tongli (HT5) horizontally     |
| 8        | NA 14         | 3 mm lateral to the Lingdao (HT4) horizontally    |
|          | NA 10         | 3 mm internal to the Erbai (EX-UE2) horizontally  |

## 8 Quality control

Both paper files and electronic documents will be preserved for at least 5 years after publication. If readers have any questions, they can contact the corresponding author for access to the original data. Patient information will remain anonymous, including name, ID number and telephone number. The protocol will be reviewed and revised by experts in acupuncture, emergency, urinary surgery, methodology and statistics. We will perform a pre-specified standard operating procedure, which

274 includes screening patients, improve relevant inspection, intramuscular injection of diclofenac,  
275 acupuncture, filling out the CRF, assessing outcomes and data management. On-site monitoring will be  
276 adopted in this trial per three months. The ethics committee of Beijing Hospital of Traditional Chinese  
277 Medicine Affiliated to Capital Medical University will audit trial conduct per 12 months.

## 278 **9 Statistical analysis**

279 Patients' baseline characteristics will be summarized based on groups. Continuous variables will  
280 be described using the mean (standard deviation), or the median (interquartile range) if the  
281 normality assumption is violated. Student's t test or Wilcoxon rank sum test (if normality is  
282 violated) will be used for comparison of continuous variables among the two groups. Categorical  
283 variables will be described using the frequency (percentage) and compared using the chi-squared  
284 test.

285 For the primary comparison, the chi-squared test will be used for the response rate (the proportion  
286 of participants whose pain reduced  $\geq 50\%$  compared with baseline). For the secondary outcomes,  
287 Student's t test, chi-squared test, Fisher's exact test or the Wilcoxon rank sum test will be used to  
288 test the difference of the outcomes including the total pain, remedial analgesia, re-visit and  
289 admission rate, blinding assessment, and adverse events, between groups according to the  
290 distribution of variables. There is no interim analysis or additional analysis in this trial.

291 All efficacy analyses will be performed using the intention-to-treat set, which includes all  
292 randomized patients. Missing data will be dealt with the last observation carried forward (LOCF).  
293 All analyses will be performed using SPSS version 23.0 (IBM SPSS Statistics, New York, USA).  
294 The level of significance will be established at  $\alpha < 0.05$  with a two-sided test.

## 295 **9 Protocol revision history**

- 296 1. The time points of 0 minute and 1 minute were changed as baseline and 0 minute, respectively.
- 297 2. The mixed effects model was used to evaluate the between-group differences of the total pain  
298 during the trial instead of Student's t test, because it is more conservative.
- 299 3. The difference of VAS at 10 minutes was evaluated with analysis of covariance (ANCOVA)  
300 adjusting for baseline VAS as sensitivity analysis according to the advice of reviewers.
- 301 4. The depth of puncture in acupuncture was 8-10 mm in this trial. The original depth of 10-15mm  
302 was a calculation error.

## 303 **References**

- 304 1. Türk C, Petřik A, Sarica K, Seitz C, Skolarikos A, Straub M, et al. EAU Guidelines on  
305 Diagnosis and Conservative Management of Urolithiasis. *Eur Urol.* 2016;69:468-74.
- 306 2. Curhan GC. Epidemiology of stone disease. *Urol Clin North Am.* 2007;34:287-93.
- 307 3. Zeng G, Mai Z, Xia S, Wang Z, Zhang K, Wang L, et al. Prevalence of kidney stones in China:  
308 an ultrasonography based cross-sectional study. *BJU Int.* 2017;120:109-16.
- 309 4. Ghani KR, Roghmann F, Sammon JD, Trudeau V, Sukumar S, Rahbar H, et al. Emergency  
310 department visits in the United States for upper urinary tract stones: trends in hospitalization  
311 and charges. *J Urol.* 2014;191:90-6.
- 312 5. Pathan SA, Mitra B, Straney LD, Afzal MS, Anjum S, Shukla D, et al. Delivering safe and  
313 effective analgesia for management of renal colic in the emergency department: a  
314 double-blind, multigroup, randomised controlled trial. *Lancet.* 2016;387:1999-2007.
- 315 6. Pathan SA, Mitra B, Cameron PA. A Systematic Review and Meta-analysis Comparing the  
316 Efficacy of Nonsteroidal Anti-inflammatory Drugs, Opioids, and Paracetamol in the  
317 Treatment of Acute Renal Colic. *Eur Urol.* 2018;73:583-95.

- 318 7. Krum H, Swergold G, Gammaitoni A, Peloso PM, Smugar SS, Curtis SP, et al. Blood  
319 pressure and cardiovascular outcomes in patients taking nonsteroidal antiinflammatory drugs.  
320 *Cardiovasc Ther.* 2012;30:342-50.
- 321 8. Coxib and traditional NSAID Trialists' (CNT) Collaboration, Bhala N, Emberson J, Merhi A,  
322 Abramson S, Arber N, et al. Vascular and upper gastrointestinal effects of non-steroidal  
323 anti-inflammatory drugs: meta-analyses of individual participant data from randomised trials.  
324 *Lancet.* 2013;382:769-79.
- 325 9. Dyloject (diclofenac sodium) Injection.  
326 [https://www.accessdata.fda.gov/drugsatfda\\_docs/nda/2014/022396Orig1s000TOC.cfm](https://www.accessdata.fda.gov/drugsatfda_docs/nda/2014/022396Orig1s000TOC.cfm).  
327 Accessed 5 August 2020.
- 328 10. Lin LL, Wang LQ, Yang JW, Tu JF, Wang TQ, Zou X, et al. Researches status on time-effect  
329 of acupuncture. *Zhongguo Zhen Jiu.* 2019;39:565-70.
- 330 11. Lee YH, Lee WC, Chen MT, Huang JK, Chung C, Chang LS. Acupuncture in the treatment  
331 of renal colic. *J Urol.* 1992;147:16-8.
- 332 12. Hong JH, Huang JL, Lu ZK. Acupuncture therapy for calculous renal colic: a  
333 meta-analysis. *Asia-Pacific Trad Med.* 2017;13:59-62.
- 334 13. Ju BJ, Niu LL. Analysis of therapeutic effect of acupuncture at Neiguan (PC 6) and  
335 Zusanli (ST 36) on acute renal colic. *Zhongguo Zhen Jiu.* 2012;32:975-8.
- 336 14. Hjermstad MJ, Fayers PM, Haugen DF, Caraceni A, Hanks GW, Loge JH, et al. Studies  
337 comparing Numerical Rating Scales, Verbal Rating Scales, and Visual Analogue Scales for  
338 assessment of pain intensity in adults: a systematic literature review. *J Pain Symptom*  
339 *Manage.* 2011;41:1073-93.
- 340 15. Wang LP, Zhang XZ, Guo J, Liu HL, Zhang Y, Liu CZ, et al. Efficacy of acupuncture for  
341 acute migraine attack: a multicenter single blinded, randomized controlled trial. *Pain Med.*  
342 2012;13:623-30.17. Sio TT, Le-Rademacher JG, Leenstra JL, Loprinzi CL, Rine G,  
343 Curtis A, et al. Effect of Doxepin Mouthwash or Diphenhydramine-Lidocaine-Antacid  
344 Mouthwash vs Placebo on Radiotherapy-Related Oral Mucositis Pain: The Alliance  
345 A221304 Randomized Clinical Trial. *JAMA.* 2019;321:1481-90.
- 346 16. Wang LP, Zhang XZ, Guo J, Liu HL, Zhang Y, Liu CZ, et al. Efficacy of acupuncture for  
347 migraine prophylaxis: a single-blinded, double-dummy, randomized controlled trial. *Pain.*  
348 2011;152:1864-71.
