# Supplementary material for: Effect of Adjunctive Acupuncture on Pain Relief Among Emergency Department Patients With Acute Renal Colic Due to Urolithiasis: A Randomized Clinical Trial
Source: PubMed Central journal article supplement (PMC9364130; doi:10.1001/jamanetworkopen.2022.25735), 2022-08-09
Supplement: jamanetwopen-e2225735-s002.pdf [file jamanetwopen-e2225735-s002.pdf]

## Supplemental Online Content

Tu JF, Cao Y, Wang LQ, et al. Effect of adjunctive acupuncture on pain relief among emergency department patients with acute renal colic due to urolithiasis: a randomized clinical trial. *JAMA Netw Open*. 2022;5(8):e2225735.  
doi:10.1001/jamanetworkopen.2022.25735

**eFigure.** Locations of Acupoints and Non-Acupoints

**eTable 1.** Locations of Non-Acupoints in the Sham Acupuncture Group

**eTable 2.** Similarities and Differences Between Acupuncture and Sham Acupuncture Groups

**eTable 3.** Sensitivity Analysis of VAS with ANCOVA Adjusting for Baseline

**eTable 4.** Evaluation of Blinding Test

This supplemental material has been provided by the authors to give readers additional information about their work.

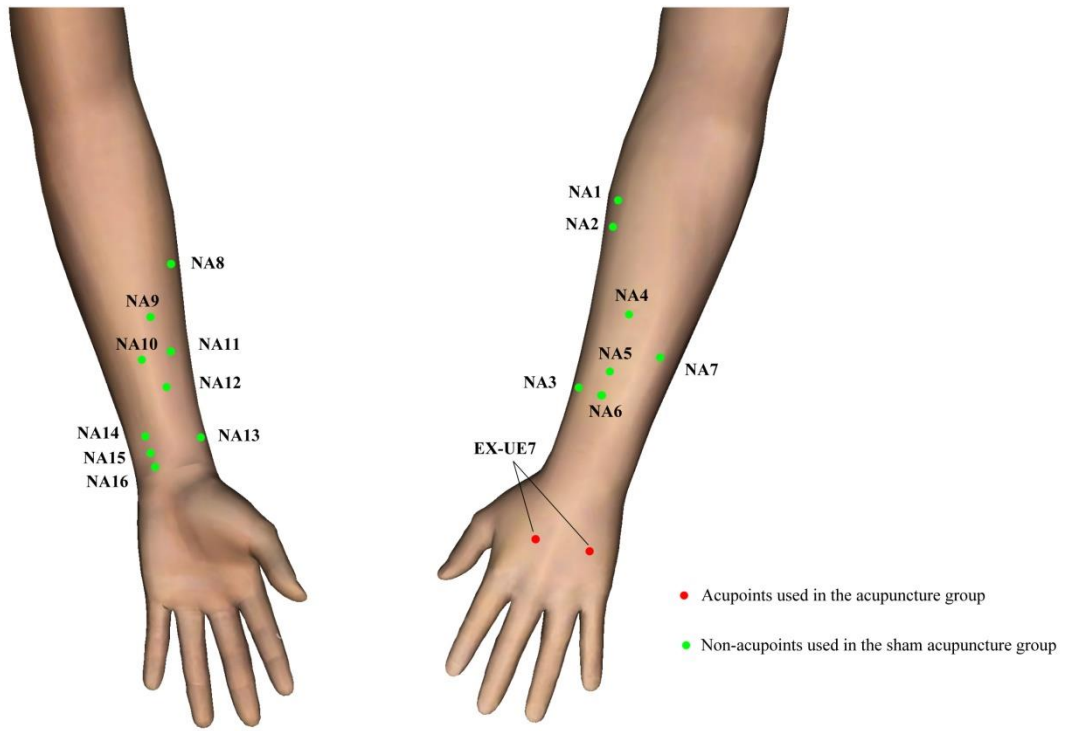

**eFigure 1. Locations of acupoints and non-acupoints**

**eTable 1. Locations of non-acupoints in the sham acupuncture group**

| Subgroup | Non-Acupoints | Locations                                         |
|----------|---------------|---------------------------------------------------|
| 1        | NA 1          | 3 mm lateral to the Shanglian (LI9) horizontally  |
|          | NA 3          | 3 mm lateral to the Pianli (LI6) horizontally     |
| 2        | NA 4          | 3 mm lateral to the Sidu (TE9) horizontally       |
|          | NA 16         | 3 mm lateral to the Yinxi (HT6) horizontally      |
| 3        | NA 6          | 3 mm lateral to the Zhigou (TE6) horizontally     |
|          | NA 8          | 3 mm lateral to the Kongzui (LU6) horizontally    |
| 4        | NA 12         | 3 mm lateral to the Jianshi (PC5) horizontally    |
|          | NA 2          | 3 mm lateral to the Xialian (LI8) horizontally    |
| 5        | NA 7          | 3 mm lateral to the Zhizheng (SI7) horizontally   |
|          | NA 11         | 3 mm lateral to the Erbai (EX-UE2) horizontally   |
| 6        | NA 5          | 3 mm lateral to the Sanyangluo (TE8) horizontally |
|          | NA 13         | 3 mm lateral to the Jingqu (LU8) horizontally     |
| 7        | NA 9          | 3 mm lateral to the Ximen (PC4) horizontally      |
|          | NA 15         | 3 mm lateral to the Tongli (HT5) horizontally     |
| 8        | NA 14         | 3 mm lateral to the Lingdao (HT4) horizontally    |
|          | NA 10         | 3 mm internal to the Erbai (EX-UE2) horizontally  |

NA, non-Acupoint.

**eTable 2. Similarities and differences between acupuncture and sham acupuncture groups**

| Items                             | Acupuncture group               | Sham acupuncture group                                                                                                                   |
|-----------------------------------|---------------------------------|------------------------------------------------------------------------------------------------------------------------------------------|
| Similarities                      |                                 |                                                                                                                                          |
| Area of points stimulated         | Upper limb                      |                                                                                                                                          |
| Number of session                 | 1                               |                                                                                                                                          |
| Number of acupoints/non-acupoints | 2                               |                                                                                                                                          |
| Number of needles                 | 4                               |                                                                                                                                          |
| Needle retention, min             | 30                              |                                                                                                                                          |
| Specification of needles          | Length: 40 mm; diameter: 0.3 mm |                                                                                                                                          |
| Differences                       |                                 |                                                                                                                                          |
| Kinds of points stimulated        | Acupoints                       | Non-acupoints                                                                                                                            |
| Region of points stimulated       | Forearm                         | Dorsum of the hand                                                                                                                       |
| Location of points stimulated     | EX-UE 7                         | 3 mm away from non-treatment related acupoints (two of LI9, LI6, TE9, HT6, TE6, LU6, PC5, LI8, SI7, EX-UE2, TE8, LU8, PC4, HT5, and HT4) |
| Depth of penetration, mm          | about 10                        | 1-4                                                                                                                                      |
| De qi                             | Yes                             | No                                                                                                                                       |

**eTable 3. Sensitivity analysis of VAS with ANCOVA adjusting for baseline**

| <b>Time</b> | <b>Acupuncture<br/>(n=40)</b> | <b>Sham acupuncture<br/>(n=40)</b> | <b>Difference<br/>(95% CI)</b> | <b>P</b> |
|-------------|-------------------------------|------------------------------------|--------------------------------|----------|
| 0 min       | 5.1 (2.5)                     | 7.4 (1.5)                          | -2.5 [-3.0, -2.0]              | <0.001   |
| 5 min       | 3.7 (2.1)                     | 6.8 (1.8)                          | -3.3 [-3.9, -2.8]              | <0.001   |
| 10 min      | 3.0 (2.0)                     | 5.9 (1.8)                          | -3.2 [-3.7, -2.6]              | <0.001   |
| 15 min      | 2.4 (2.1)                     | 4.9 (2.2)                          | -2.7 [-3.4, -2.0]              | <0.001   |
| 20 min      | 1.5 (1.8)                     | 4.1 (2.0)                          | -2.7 [-3.4, -2.0]              | <0.001   |
| 30 min      | 0.9 (1.3)                     | 3.1 (1.8)                          | -2.3 [-2.9, -1.7]              | <0.001   |
| 45 min      | 0.6 (1.2)                     | 1.8 (1.7)                          | -1.3 [-1.9, -0.7]              | <0.001   |
| 60 min      | 0.5 (1.4)                     | 1.3 (1.5)                          | -0.9 [-1.5, -0.2]              | 0.007    |

Abbreviations: VAS: visual analogue scale; ANCOVA, analysis of covariance.

Data were presented as mean (SD).

**eTable 4. Evaluation of blinding test**

| <b>Guess</b> | <b>Acupuncture<br/>(n=40)</b> | <b>Sham acupuncture<br/>(n=40)</b> | <b><i>P</i></b> |
|--------------|-------------------------------|------------------------------------|-----------------|
| Correct      | 6 (15.0)                      | 3 (7.5)                            | 0.48            |
| Unknown      | 34 (85.0)                     | 37 (92.5)                          |                 |
| Incorrect    | 0                             | 0                                  |                 |
