# Supplementary material for: Effect of Adjunctive Acupuncture on Pain Relief Among Emergency Department Patients With Acute Renal Colic Due to Urolithiasis: A Randomized Clinical Trial
Source: PubMed Central journal article supplement (PMC9364130; doi:10.1001/jamanetworkopen.2022.25735), 2022-08-09
Supplement: jamanetwopen-e2225735-s003.pdf [file jamanetwopen-e2225735-s003.pdf]

## Data Sharing Statement

Tu. Effect of Adjunctive Acupuncture on Pain Relief Among Emergency Department Patients With Acute Renal Colic Due to Urolithiasis. *JAMA Netw Open*. Published August 09, 2022. doi:10.1001/jamanetworkopen.2022.25735

### Data

**Data available:** Yes

**Data types:** Deidentified participant data

**How to access data:** The deidentified participant data are available upon reasonable request until 2 years after publication, via the corresponding author [e-mail, [lcz623780@126.com](mailto:lcz623780@126.com)]. The data can be made available to researchers who provide a methodologically sound proposal in their request.

**When available:** With publication

### Supporting Documents

**Document types:** None

### Additional Information

**Who can access the data:** Researchers whose proposed use of the data has been approved.

**Types of analyses:** For any purpose or for a specified purpose

**Mechanisms of data availability:** after approval of a proposal
